# Supplementary material for: Copper (Cu2+) ion-induced misfolding of tau protein R3 peptide revealed by enhanced molecular dynamics simulation
Source: Royal Society of Chemistry journal article supplement (doi:10.1039/d0cp05744d), 2021-01-01
Supplement: d0cp05744d1.pdf [file d0cp05744d1.pdf]

Supplementary Information for

**Copper (Cu<sup>2+</sup>) Ion Induced Misfolding of Tau Protein R3 Peptide Revealed by  
Enhanced Molecular Dynamics Simulation**

Jing Jing<sup>1,2</sup>, Gao Tu<sup>2</sup>, Hongyan Yu<sup>1,2</sup>, Rong Huang<sup>3,4</sup>, Xianquan Ming<sup>5</sup>, Haiqing Zhan<sup>5</sup>,  
Feng Zhan<sup>1\*</sup>, Weiwei Xue<sup>2,3\*</sup>

<sup>1</sup> *The Key Laboratory of Nonferrous Metal Materials and New Processing Technology of Ministry of Education, Guangxi University, Nanning 530004, China*

<sup>2</sup> *School of Pharmaceutical Sciences and Innovative Drug Research Centre, Chongqing Key Laboratory of Natural Product Synthesis and Drug Research, Chongqing University, Chongqing 401331, China*

<sup>3</sup> *Central Nervous System Drug Key Laboratory of Sichuan Province, Luzhou 646106, China*

<sup>4</sup> *Sichuan Credit Pharmaceutical Co., Ltd., Luzhou 646106, China*

<sup>5</sup> *CITIC Dameng Mining Industries Ltd, Nanning 530028, China*

**\*Corresponding Author**

Dr. Weiwei Xue

Email: xueww@cqu.edu.cn

Dr. Feng Zhan

Email: fzhan\_gxu@126.com

**Table S1.** The residues interaction networks (RINs) of Cu<sup>2+</sup>-R3 and R3 peptide systems. Atom names are reported according to the PDB standard. The hydrogen bond (HBOND) has been split into main chain (MC) and side chain (SC) interactions. For Van der Waals (VDW) interaction, the distance is calculated considering atom surface instead of atom center

| Systems              | NodeId1 | NodeId2 | Interaction | Distance (Å) | Angle (°)           | Atom1 | Atom2 |
|----------------------|---------|---------|-------------|--------------|---------------------|-------|-------|
| Cu <sup>2+</sup> -R3 | 2: THR  | 5: CYS  | HBOND:MC_MC | 3.243        | 26.684              | O     | N     |
|                      | 4: LYS  | 9: GLY  | VDW:MC_MC   | 3.562        | -999.9 <sup>a</sup> | C     | C     |
|                      | 4: LYS  | 13: HIS | HBOND:SC_SC | 2.992        | 37.74               | NZ    | ND1   |
|                      | 6: GLY  | 9: GLY  | HBOND:MC_MC | 3.253        | 23.235              | O     | N     |
|                      | 6: GLY  | 10: ASN | HBOND:MC_MC | 3.106        | 14.599              | O     | N     |
|                      | 7: SER  | 10: ASN | HBOND:MC_MC | 3.279        | 47.195              | O     | N     |
|                      | 7: SER  | 11: ILE | HBOND:MC_MC | 2.87         | 9.961               | O     | N     |
|                      | 8: LEU  | 12: HIS | HBOND:MC_MC | 3.145        | 35.822              | O     | N     |
|                      | 9: GLY  | 12: HIS | HBOND:MC_MC | 3.341        | 41.872              | O     | N     |
|                      | 9: GLY  | 13: HIS | HBOND:MC_MC | 3.014        | 26.591              | O     | N     |
|                      | 10: ASN | 13: HIS | HBOND:MC_MC | 3.381        | 45.736              | O     | N     |
|                      | 10: ASN | 14: LYS | HBOND:MC_MC | 3.027        | 17.129              | O     | N     |
|                      | 10: ASN | 14: LYS | VDW:SC_SC   | 3.779        | -999.9              | ND2   | CE    |
|                      | 11: ILE | 14: LYS | HBOND:MC_MC | 3.239        | 53.4                | O     | N     |
| R3                   | 4: LYS  | 7: SER  | HBOND:MC_MC | 3.207        | 18.396              | O     | N     |
|                      | 4: LYS  | 7: SER  | VDW:MC_SC   | 3.994        | -999.9              | C     | CB    |
|                      | 6: GLY  | 9: GLY  | HBOND:MC_MC | 3.219        | 52.209              | O     | N     |
|                      | 14: LYS | 17: GLY | HBOND:SC_MC | 3.218        | 59.035              | NZ    | O     |
|                      | 14: LYS | 17: GLY | VDW:SC_MC   | 3.427        | -999.9              | CB    | C     |
|                      | 15: PRO | 18: GLY | HBOND:MC_MC | 2.907        | 38.986              | O     | N     |

<sup>a</sup> For VDW interactions and IAC it is not possible to infer any angle and the -999.9 (NULL) value is assigned.

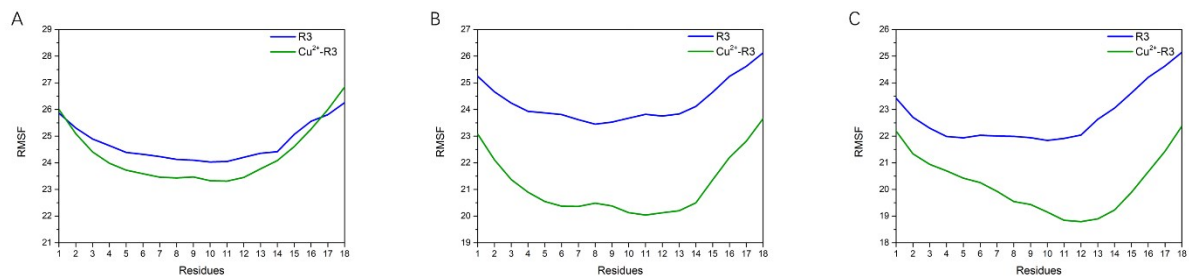

**Figure S1.** (A-C) Root mean square fluctuation (RMSF) values of 1/2 R3 peptide and Cu<sup>2+</sup>-R3 peptide system during the three independent 1000 ns GaMD simulations. The blue and green lines represent 1/2 R3 peptide and Cu<sup>2+</sup>-R3 peptide system.
